# Supplementary material for: Characterization of Chemically-Induced Bacterial Ghosts (BGs) Using Sodium Hydroxide-Induced <em>Vibrio parahaemolyticus </em>Ghosts (VPGs)
Source: Preprints.org preprint supplement (doi:10.20944/preprints201608.0162.v1), 2016-08-17
Supplement: Supplementary file 1 [file supplementary]

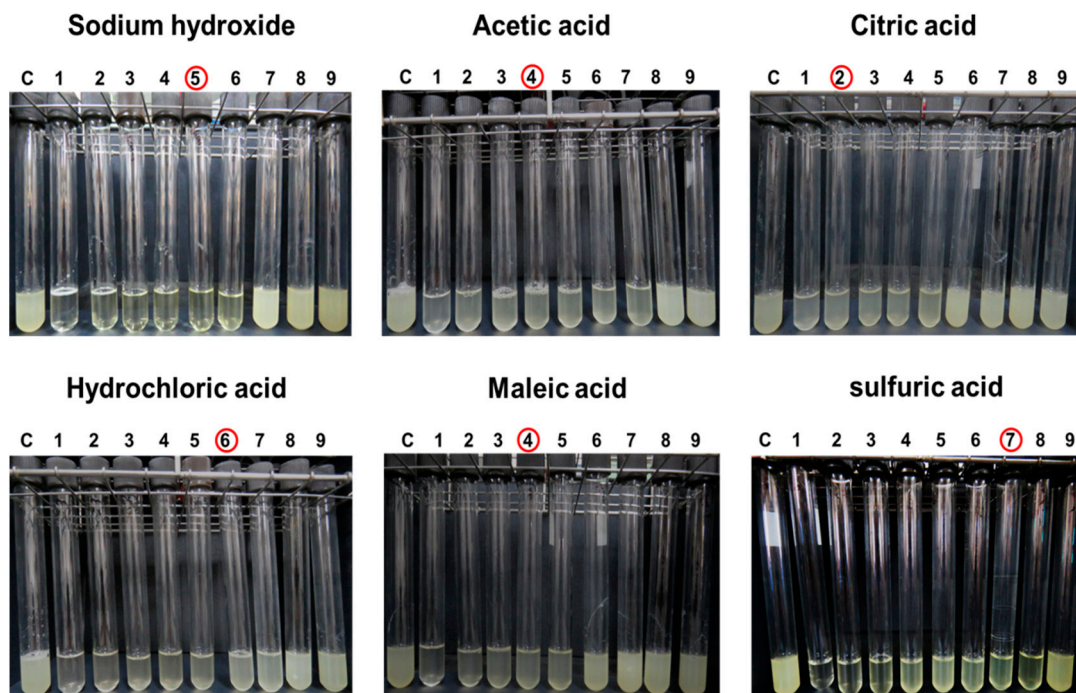

**Figure S1.** Determination of MIC of *V. parahaemolyticus* PCU-1 bacterial cells treated with various chemicals, respectively. Red circle indicates the MIC of each chemical. Tubes 1-9 represent bacterial culture tube treated with respective chemicals at 50, 25, 12.5, 6.25, 3.125, 1.563, 0.781, 0.391 and 0.195 mg/ml and tube C (none-treated control).

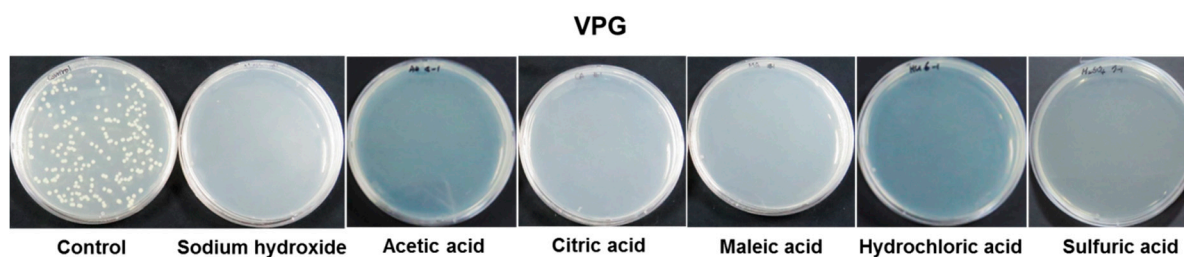

**Figure S2.** *V. parahaemolyticus* PCU-1 bacterial cells showed no viability when treated with respective chemicals at their MICs.

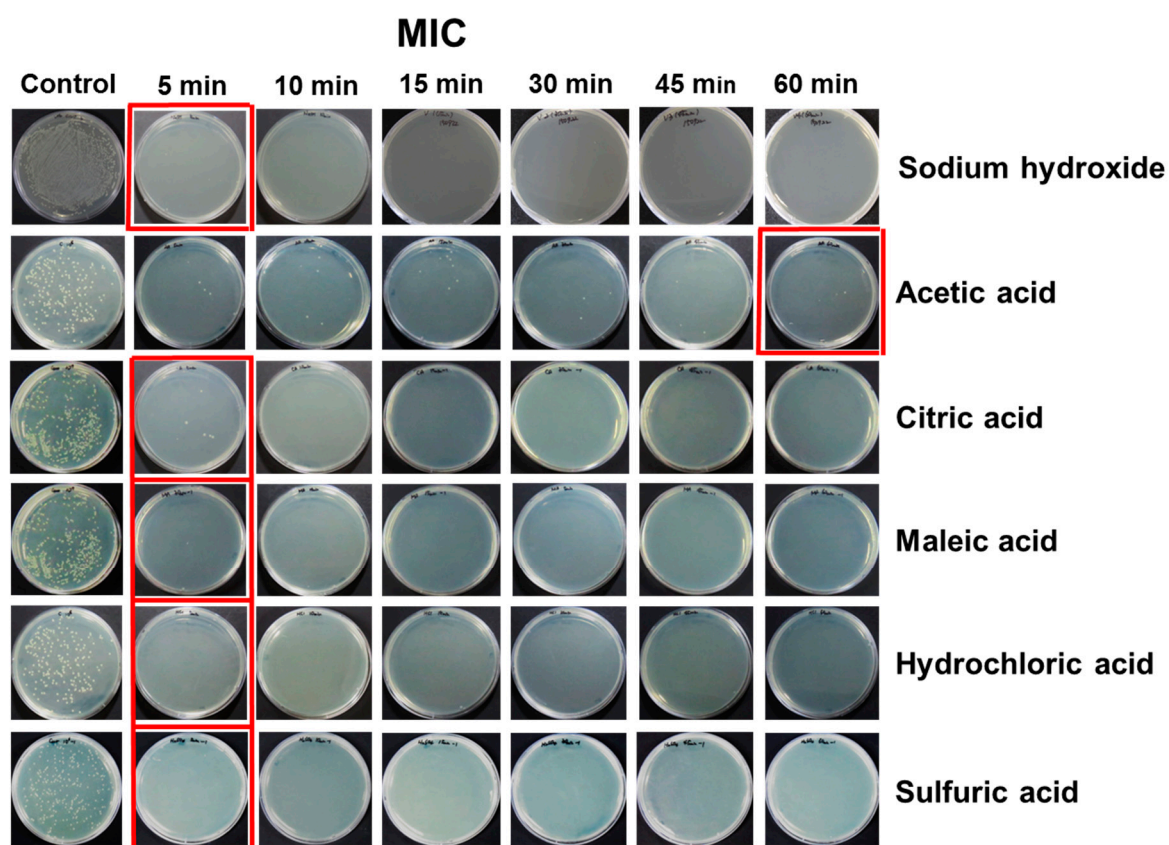

**Figure S3.** Determination of VPGs viability. From left, non-treated control *V. parahaemolyticus* PCU-1 bacterial cells (C) and NaOH MIC-induced VPGs after 15, 30, 45 and 60 min.
